# Supplementary material for: Grape bunches of novel conjugated chain bonded fullerene oligomers: design of a potential electron trap carbonaceous molecular material
Source: Royal Society of Chemistry journal article supplement (doi:10.1039/d2cp05731j), 2023-01-01
Supplement: d2cp05731j1.pdf [file d2cp05731j1.pdf]

## *Electronic Supplementary Information (ESI)*

# **Grape bunches of novel conjugated chain bonded fullerene oligomers: Design of a potential electron trap carbonaceous molecular material**

Kun Yuan<sup>a,\*</sup>, Lingling Lv<sup>a</sup>, Xu Yan<sup>a</sup>, Yanzhi Liu<sup>a</sup>, Mengyang Li<sup>b,\*</sup>, Yaoxiao Zhao<sup>c, d</sup>,  
Xiang Zhao<sup>d</sup>

<sup>a</sup> College of Chemical Engineering and Technology, Tianshui Normal University, Tianshui 741001, China

<sup>b</sup> School of Physics, Xidian University, Xi'an 710071, China

<sup>c</sup> School of Materials Science and Chemical Engineering, Xi'an Technological University, Xi'an 710021, China

<sup>d</sup> Institute of Molecular Science & Applied Chemistry, School of Chemistry, Xi'an Jiaotong University, Xi'an 710049, China

### Content of the Electronic Supplementary Information (ESI):

Fig. S1 Key bond length parameters (in Å) of the five **CBFOs** structures at B3LYP/6-31G(d), B3LYP/6-31+G(d) (in brackets) and B3LYP-GD3BJ/def2-tzvp (in italic)

Fig. S2 Kinetic study of geometries in Path 2 and the change in the reaction Gibbs free energies for **TDD-3-carbene (L-P3)**.

Fig. S3 Kinetic study of geometries in Path 3 and the change in the reaction Gibbs free energies for **TDD-3-carbene (LS-P3)**.

Fig. S4 Kinetic study of geometries in Path 4 and the change in the reaction Gibbs free energies for **TDD-3-carbene (SL-P3)**.

Fig. S5 Relative electrophilic index (*I*) of **D** and **CBFOs** for EA<sub>a-2s</sub> (singlet) and EA<sub>v-2s</sub> (singlet).

Fig. S6 Highest occupied molecular orbital (HOMO) and the lowest unoccupied molecular orbital (LUMO) and LUMO+1 of C<sub>60</sub>, **D** and **T2c**

Fig. S7 Density of states (DOS) of **D**, **T1t**, **T2t** and **T3**. The brown lines represent the Fermi levels, defined as the midpoint between the highest occupied and lowest unoccupied

---

\* corresponding author, e-mail: yuankun@tsnu.edu.cn

states.

Fig. S8 Energetical band structure of **2D-T3** along high symmetry points, and the density of states, the partial density states of *p* orbitals of carbon atoms

Fig. S9 Electron localization function (ELF) for (a) three dimension and (b) two-dimension plot of **2D-T3**.

Fig. S10 UV-vis spectrum of the five **CBFOs** under PBE0/6-31G(d) theoretical level

Fig. S11 Relationship between absorption index and radiation energy for **D**, **CBFOs** and **2D-T3**.

Table S1 The energies of *cis* and *trans* configurations of **TDD-1** and **TDD-2**

Table S2 The energies of *cis* and *trans* configurations of **T1c**, **T1t**, **T2c** and **T2t**

Table S3 The first vertical electron affinity ( $EA_{v1}$ , eV) of  $C_{60}$ , dimer (**D**) and five **CBFOs** at B3LYP/6-31G(d) and B3LYP/6-31+G(d) levels of theory

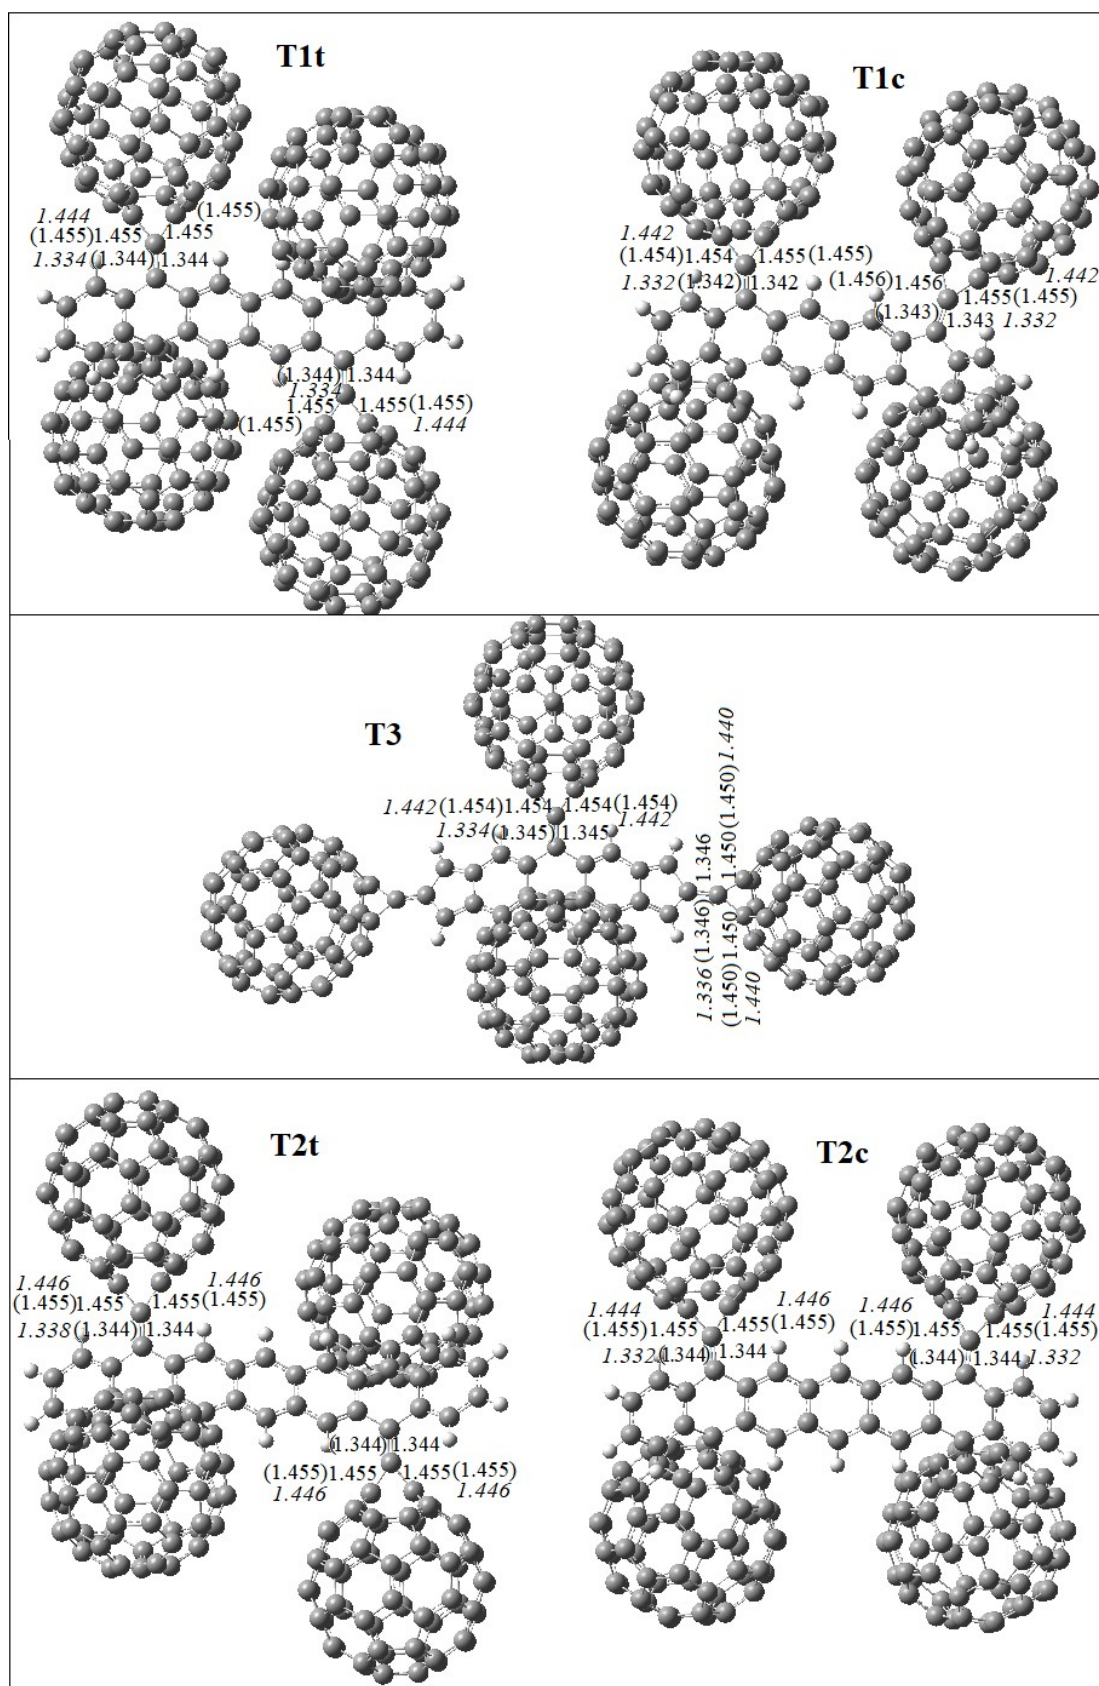

**Fig. S1** Key bond length parameters (in Å) of the five **CBFOs** structures at B3LYP/6-31G(d), B3LYP/6-31+G(d) (in brackets) and B3LYP-GD3BJ/def2-tzvp (in italic)

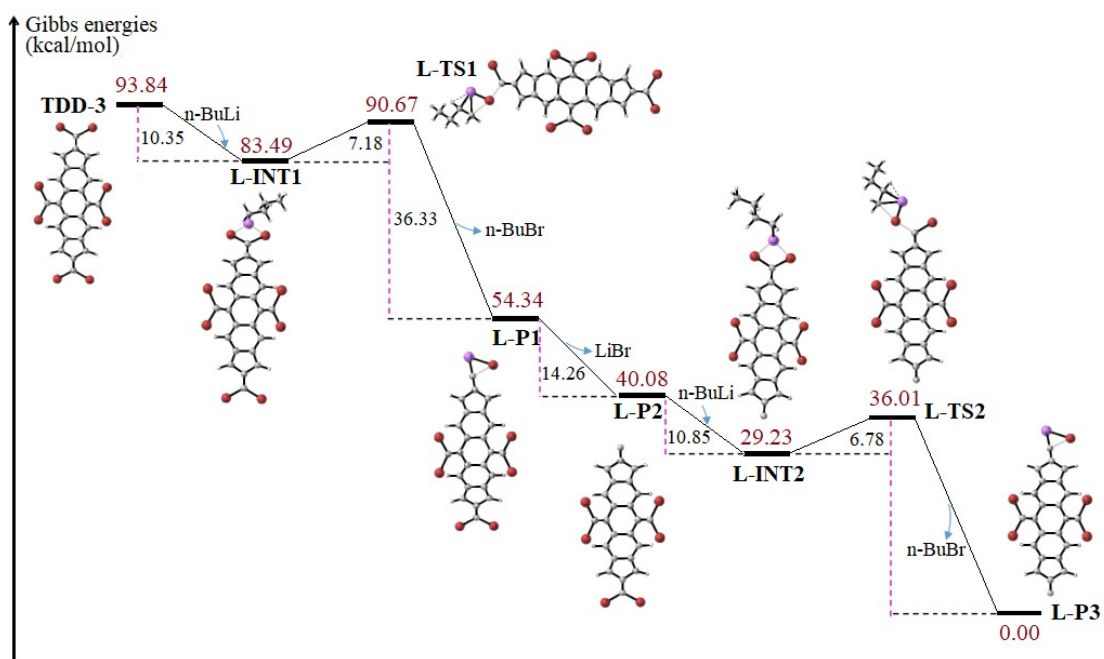

**Fig. S2** Kinetic study of geometries in Path 2 and the change in the reaction Gibbs free energies for TDD-3-carbene (L-P3).

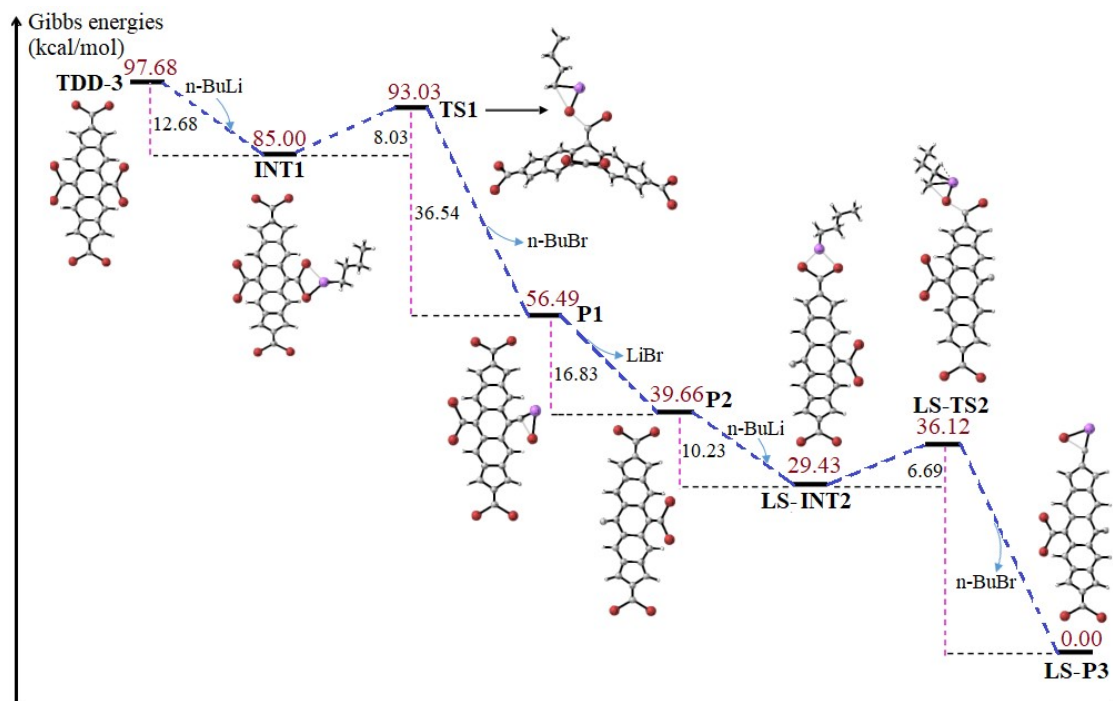

**Fig. S3** Kinetic study of geometries in Path 3 and the change in the reaction Gibbs free energies for TDD-3-carbene (LS-P3).

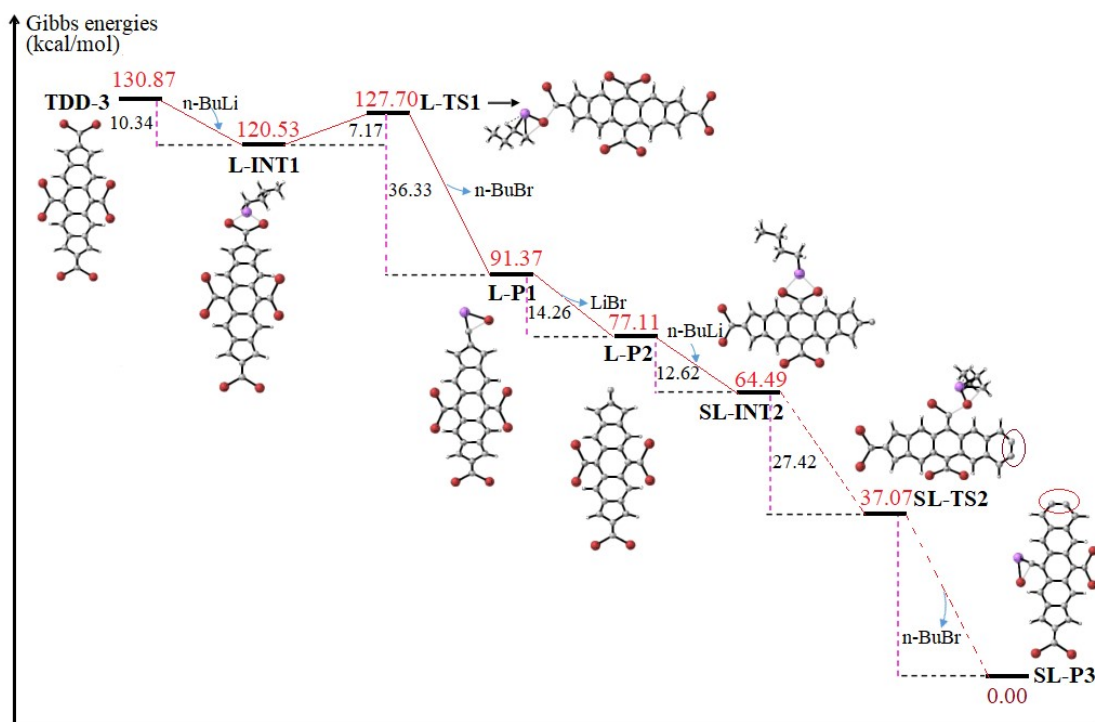

**Fig. S4** Kinetic study of geometries in Path 4 and the change in the reaction Gibbs free energies for phenylalkyne intermediate (SL-P3).

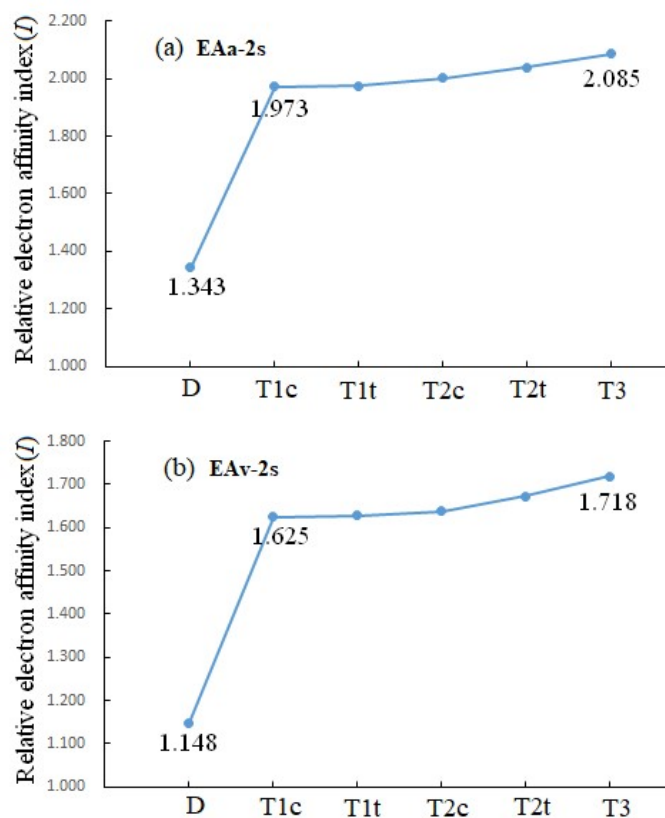

**Fig. S5** Relative electrophilic index (*I*) of **D** and **CBFOs** for EA<sub>a-2s</sub> (singlet) and EA<sub>v-2s</sub> (singlet).



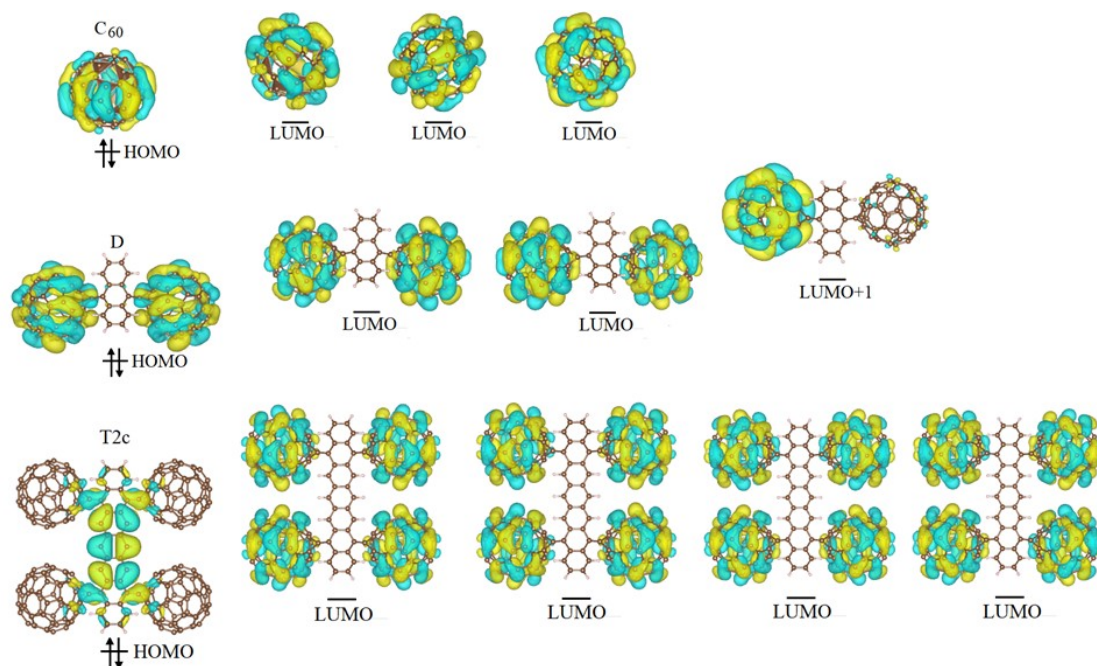

**Fig. S6** Highest occupied molecular orbital (HOMO) and the lowest unoccupied molecular orbital (LUMO) and LUMO+1 of C<sub>60</sub>, **D** and **T2c**.

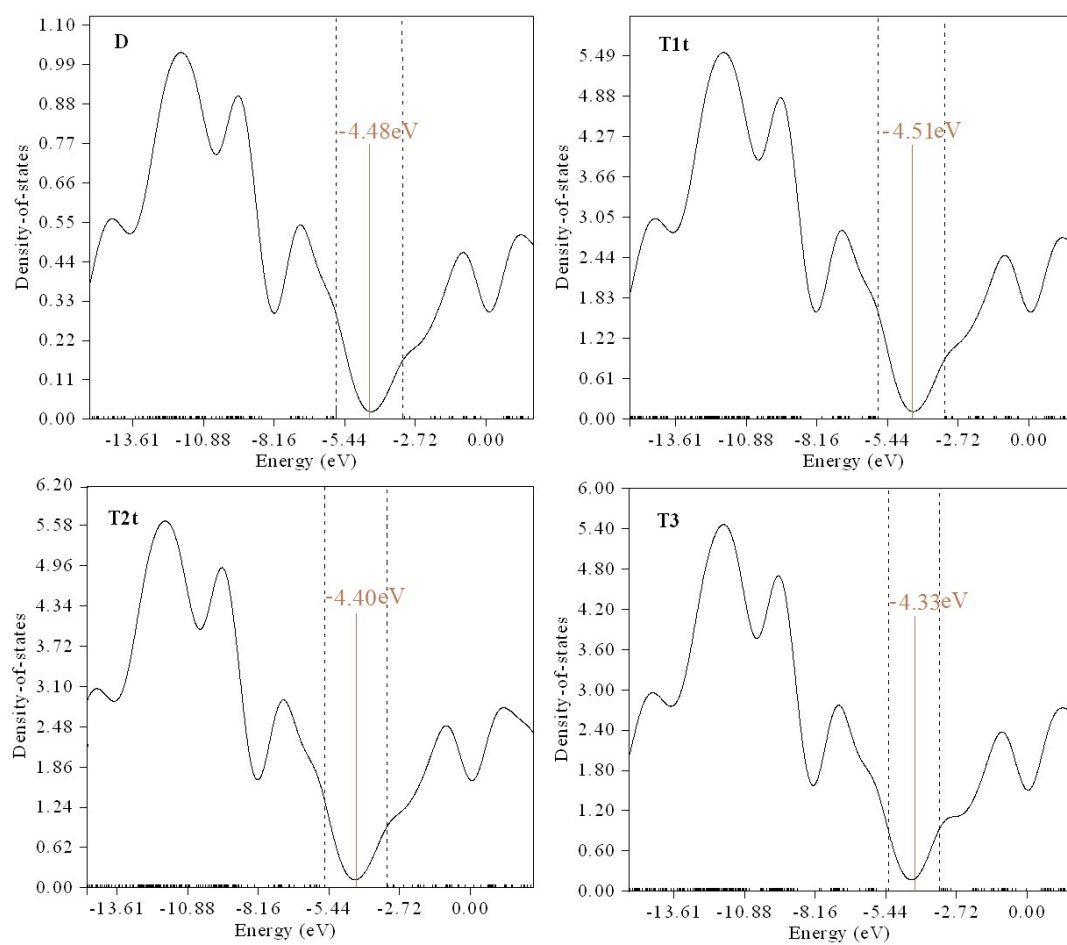

**Fig. S7** Density of states (DOS) of **D**, **T1t**, **T2t** and **T3**. The brown lines represent the Fermi levels, defined as the midpoint between the highest occupied and lowest unoccupied states.

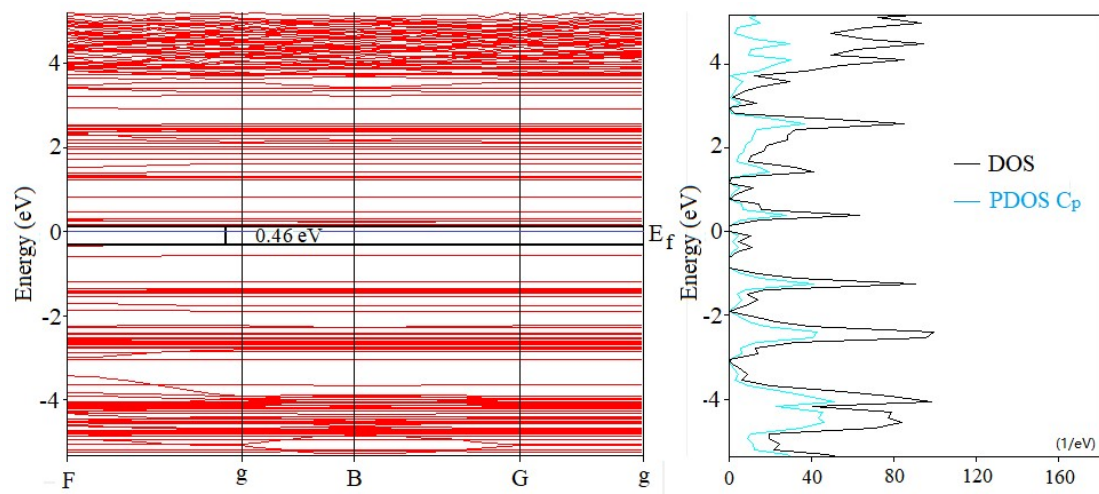

**Fig. S8** Energetical band structure of **2D-T3** along high symmetry points, and the density of states, the partial density states of  $p$  orbitals of carbon atoms.

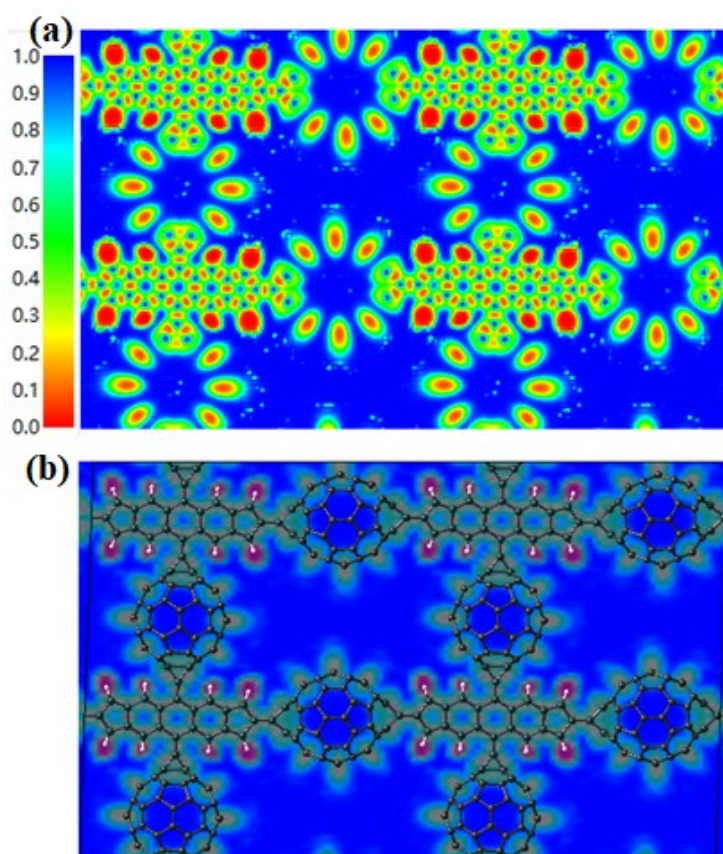

**Fig. S9** Electron localization function (ELF) of (a) three-dimension and (b) two-dimension plot for **2D-T3**.

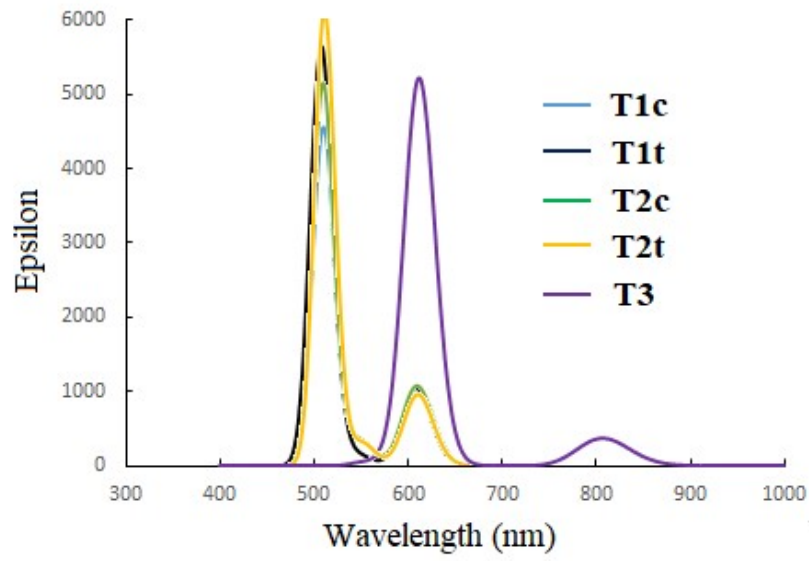

**Fig. S10** UV-vis spectrum of the five CBFOs under PBE0/6-31G(d) theoretical level.

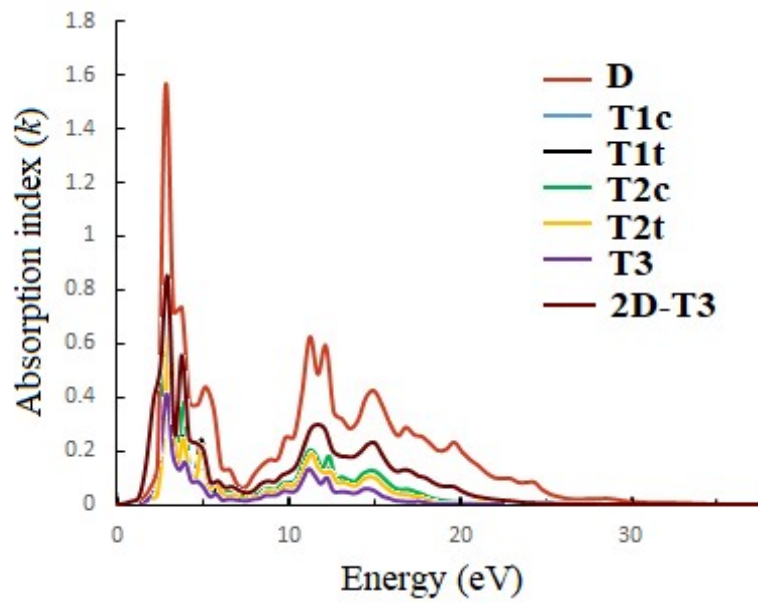

**Fig S11** Relationship between absorption index and radiation energy for D, CBFOs and 2D-T3.



Table S1 The energies of *cis* and *trans* configurations of **TDD-1** and **TDD-2**

| B3LYP/6-31G(d)              |              |                                           |                             |              |                                           |
|-----------------------------|--------------|-------------------------------------------|-----------------------------|--------------|-------------------------------------------|
| Configurations              | Energy/a.u.  | Relative energy<br>kcal·mol <sup>-1</sup> | Configurations              | Energy/a.u.  | Relative energy<br>kcal·mol <sup>-1</sup> |
| <i>cis</i> - <b>TDD-1</b>   | -21743.76962 | 0.07                                      | <i>cis</i> - <b>TDD-2</b>   | -21897.44201 | 0.01                                      |
| <i>trans</i> - <b>TDD-1</b> | -21743.76974 | 0                                         | <i>trans</i> - <b>TDD-2</b> | -21897.44199 | 0                                         |
| B3LYP-GD3BJ/def2-tzvp       |              |                                           |                             |              |                                           |
| Configurations              | Energy/a.u.  | Relative energy<br>kcal·mol <sup>-1</sup> | Configurations              | Energy/a.u.  | Relative energy<br>kcal·mol <sup>-1</sup> |
| <i>cis</i> - <b>TDD-1</b>   | -21744.38516 | 0                                         | <i>cis</i> - <b>TDD-2</b>   | -21898.09332 | 0.031                                     |
| <i>trans</i> - <b>TDD-1</b> | -21744.38512 | 0.025                                     | <i>trans</i> - <b>TDD-2</b> | -21898.09337 | 0                                         |

Table S2 The energies of *cis* and *trans* configurations of **T1c**, **T1t**, **T2c** and **T2t**

| B3LYP/6-31G(d)       |               |                                           |                |               |                                           |
|----------------------|---------------|-------------------------------------------|----------------|---------------|-------------------------------------------|
| Configurations       | Energy/a.u.   | Relative energy<br>kcal·mol <sup>-1</sup> | Configurations | Energy/a.u.   | Relative energy<br>kcal·mol <sup>-1</sup> |
| <b>T1c</b>           | -10295.012129 | 1.87                                      | <b>T2c</b>     | -10448.652896 | 0                                         |
| <b>T1t</b>           | -10295.015137 | 0                                         | <b>T2t</b>     | -10448.652851 | 0.03                                      |
| B3LYP/6-31+G(d)      |               |                                           |                |               |                                           |
| Configurations       | Energy/a.u.   | Relative energy<br>kcal·mol <sup>-1</sup> | Configurations | Energy/a.u.   | Relative energy<br>kcal·mol <sup>-1</sup> |
| <b>T1c</b>           | -10295.231754 | 2.06                                      | <b>T2c</b>     | -10448.876825 | 0                                         |
| <b>T1t</b>           | -10295.235037 | 0                                         | <b>T2t</b>     | -10448.876049 | 0.48                                      |
| B3LYP-D3BJ/def2-tzvp |               |                                           |                |               |                                           |
| Configurations       | Energy/a.u.   | Relative energy<br>kcal·mol <sup>-1</sup> | Configurations | Energy/a.u.   | Relative energy<br>kcal·mol <sup>-1</sup> |
| <b>T1c</b>           | -10299.690314 | 0.13                                      | <b>T2c</b>     | -10453.395411 | 0                                         |
| <b>T1t</b>           | -10299.690520 | 0                                         | <b>T2t</b>     | -10453.391247 | 2.61                                      |

Table S3 The first vertical electron affinity (EA<sub>v1</sub>, eV) of C<sub>60</sub>, dimer (**D**) and five **CBFOs** at B3LYP/6-31G(d) and B3LYP/6-31+G(d) levels of theory

|                              | C <sub>60</sub> | <b>D</b> | <b>T1c</b> | <b>T1t</b> | <b>T2c</b> | <b>T2t</b> | <b>T3</b> |
|------------------------------|-----------------|----------|------------|------------|------------|------------|-----------|
| EA <sub>v1</sub> (6-31+g(d)) | -2.52           | -2.86    | -3.07      | -3.08      | -3.07      | -3.1       | -3.16     |
| EA <sub>v1</sub> (6-31g(d))  | -1.99           | -2.38    | -2.61      | -2.61      | -2.61      | -2.63      | -2.71     |
| ΔEA <sub>v1</sub>            | 0.53            | 0.48     | 0.46       | 0.47       | 0.46       | 0.47       | 0.45      |

ΔEA<sub>v1</sub> is the difference between two levels of theory for the corresponding structure
